# Supplementary material for: Early Aberrant Angiogenesis Due to Elastic Fiber Fragmentation in Aortic Valve Disease
Source: MDPI journal article supplement (doi:10.3390/jcdd8070075), 2021-06-25
Supplement: s1 [file s1]

## Supplemental Information

### Supplemental Tables

**Table S1. Specifications of primary antibodies**

| Protein        | Marker            | Host and Type     | Source              | Dilution   |
|----------------|-------------------|-------------------|---------------------|------------|
| Elastin        | Elastic Fiber     | Mouse monoclonal  | Sigma-Aldrich       | 1:500      |
| Fibrillin-1    | Elastic Fiber     | Rabbit polyclonal | Abcam               | 1:50       |
| Emilin-1       | Elastic Fiber     | Rabbit polyclonal | Sigma-Aldrich       | 1:50       |
| Fibulin-4      | Elastic Fiber     | Rabbit polyclonal | Novus Biologicals   | 1:50       |
| Fibulin-5      | Elastic Fiber     | Mouse monoclonal  | Abcam               | 1:500      |
| Lysyl Oxidase  | Elastic Fiber     | Rabbit polyclonal | Lifespan Bioscience | 1:75       |
| VEGF-A         | Angiogenesis      | Rabbit polyclonal | Santa Cruz, 152     | 1:50       |
| Chondromodulin | Angiostasis       | Rabbit polyclonal | Lifespan Bioscience | 1:50       |
| CD-31          | Endothelial cells | Rabbit polyclonal | Abcam               | 1:100      |
| CD-68          | Inflammation      | Rabbit polyclonal | Ventana             | prediluted |
| LRP-5          | Atherosclerosis   | Rabbit polyclonal | Biovision           | 1:50       |

## Supplemental Figures

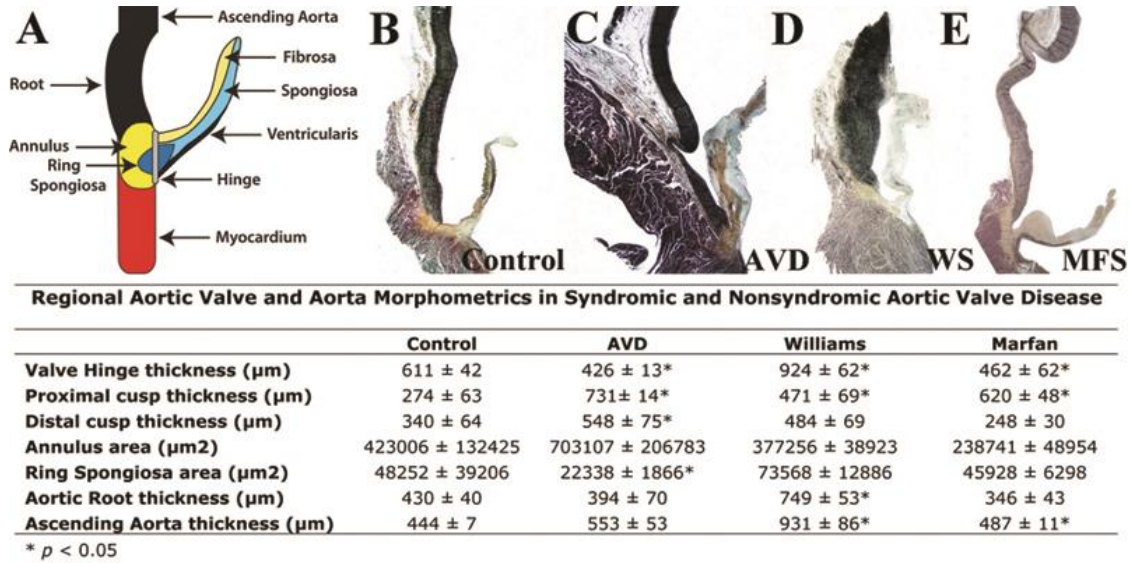

**Figure S1. Regional aortic valve and aorta pathology in syndromic and non-syndromic AVD.** A model of unaffected aortic root anatomy shows the annulus and ring spongiosa regions in a longitudinal plane evenly separating a sinus of Valsalva (A). Low magnification images (Scale 1X) of whole heart specimens demonstrate gross differences between early AVD (C), WS (D) and MFS (E) specimens when compared to Control (B). The aortic root and ascending aorta measurements are restricted to the medial layer. Related morphometrics are shown in the Table.

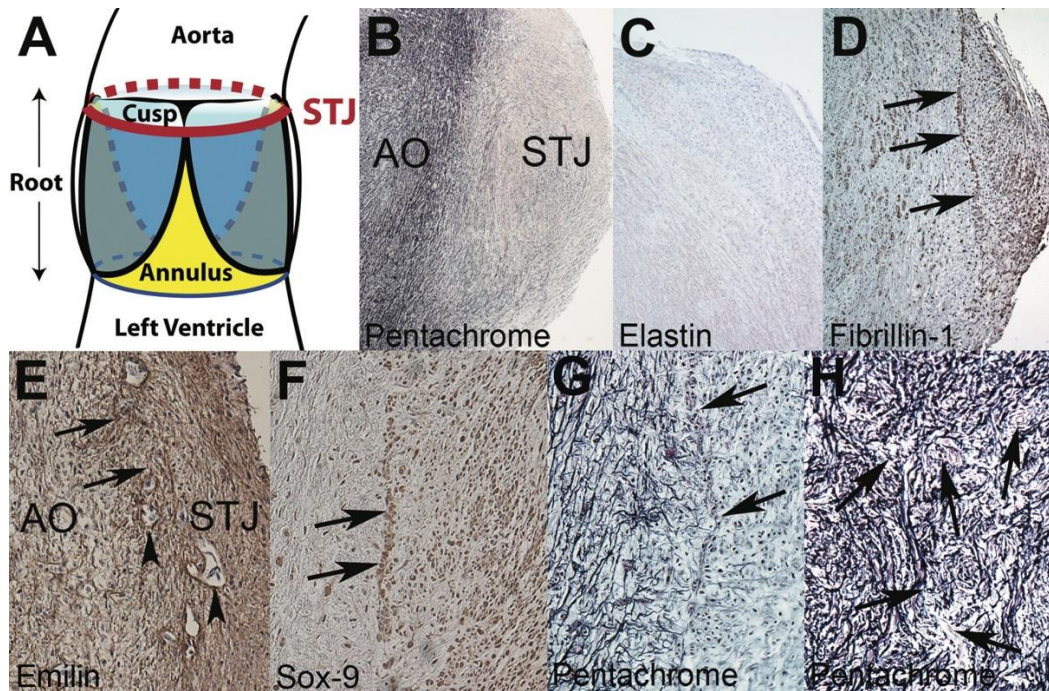

**Figure S2. Valve tissue contributes to the sinotubular junction (STJ) narrowing in the WS aorta (AO).** The complex anatomy of the aortic valve and aortic root is shown in panel A. The STJ is fibrous (B), consistent with valve tissue, and characterized by weak elastin expression (C) and strong fibrillin (D) and emilin (E) expression. There is a string of cartilage-like halo cells at the boundary of fibrous and artery tissues (arrows, E,F,G), which is characterized by positive Sox-9 expression (F). There is neovessel formation both in the fibrous STJ (arrowheads, E) and the proximate aortic media (arrows, H).



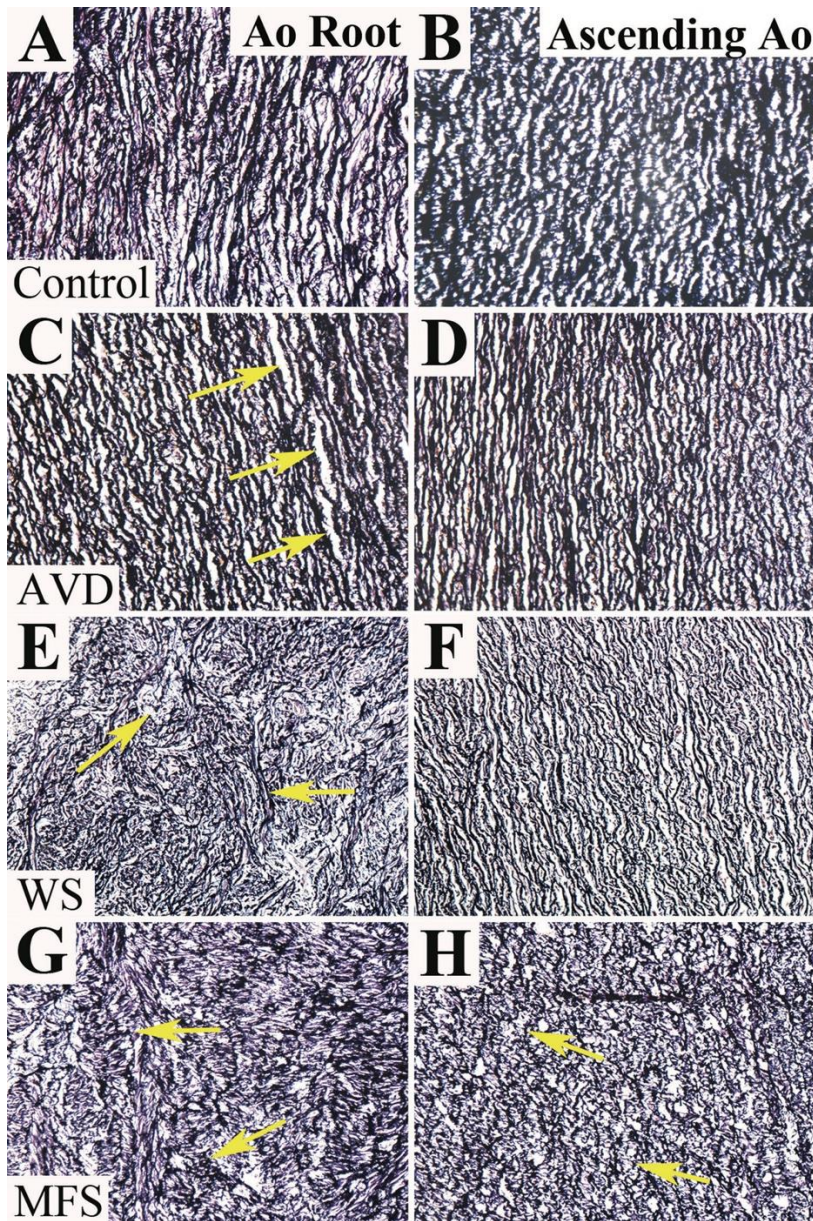

**Figure S3. Aortic root histopathology is more severe and distinct from ascending aorta pathology in syndromic and nonsyndromic AVD.** The aortic root (A,C,E,G) and ascending aorta (B,D,F,H) is shown in control (A,B), early AVD (C,D), WS (E,F), and MFS (G,H). MFS aortic roots are more severely affected (G vs. H), characterized by disrupted intra-EFF. In contrast, WS and AVD aortic root tissue is characterized by disrupted inter-EFF.
